# Supplementary material for: Effects of Different Polystyrene Concentrations on the Bioaccumulation of As, Cd, and Pb in Ruditapes Philippinarum
Source: Research Square preprint supplement (doi:10.21203/rs.3.rs-1237924/v1), 2022-02-15
Supplement: Supplementary file 1 [file 799cdb4d0038c9573ae2dc6b.docx]

Research Highlights of “Effects of different polystyrene concentrations on the bioaccumulation of As, Cd, and Pb in Ruditapes philippinarum”

Dear Editor and Reviewers,

This paper entitled “Effects of different polystyrene concentrations on the bioaccumulation of As, Cd, and Pb in Ruditapes philippinarum” has four highlights:

- A low concentration of PS (0.1%, 1%) inhibited heavy-metal bioaccumulation
- A high concentration of PS (5%, 10%) promoted their accumulation.
- Concentration of As, Cd, and Pb in clams increased with time.
- The bioaccumulation of heavy metals and PS in clams should be observed over a range of times.
